# Supplementary material for: Function of the Pseudomonas aeruginosa NrdR Transcription Factor: Global Transcriptomic Analysis and Its Role on Ribonucleotide Reductase Gene Expression
Source: PubMed Central journal article supplement (PMC4409342; doi:10.1371/journal.pone.0123571), 2015-04-24
Supplement: pone.0123571.s006.pdf [file pone.0123571.s006.pdf]

**S1 Table. Primers and probes used in this study.**

| <b>Name</b>        | <b>Sequence (5'→3')</b>        | <b>Application</b>                   |
|--------------------|--------------------------------|--------------------------------------|
| PnrRBHI-up         | AGGATCCAGGAGAAGGACGGCCAGCAG    | Promoter-probe cloning               |
| PnrRClaI-lw        | AAAATCGATATGGTGTCATGGGCACCCGAC | Promoter-probe cloning               |
| NrdRHindIII-low    | AAGCTTCATGTACAGCGGGT           | Cloning                              |
| pBBR1-up           | CATCGCAGTCGGCCTATTGG           | Check-Cloning                        |
| pBBR1-lw           | CACTTTATGCTTCCGGCTCG           | Check-Cloning                        |
| M13-dir            | GTTTTCCCAGTCACGAC              | Check-Cloning                        |
| M13-rev            | CAGGAAACAGCTATGAC              | Check-Cloning                        |
| pUCP20T-up         | CCTCTTCGCTATTACGCCAG           | Cloning                              |
| pUCP20T-low        | TCCGGCTCGTATGTTGTGTG           | Cloning                              |
| PtopA BamHI-up     | GGATCCGAAGAGGCGCTGGTGATCTA     | Cloning                              |
| PtopA ClaI-low     | ATCGATGTACTGGCTGCCAGGTACT      | Cloning                              |
| PnrDA-up           | AGGATCCGAATTCTTGCTCCACACAGCCTC | Cloning/RT-PCR                       |
| PnrDA-low          | ACCCGGGTTCTCGCGTGTGGTGTCG      | Cloning/RT-PCR                       |
| PnrDJ BamHI new-up | GGATCCCGCGCCAGCTGAAGGCC        | Cloning/RT-PCR                       |
| PnrDJ SmaI new-low | AACCCGGGGACTGCGTTGCGTCTGTC     | Cloning/RT-PCR                       |
| PnrDD-up           | AGGATCCGAATTCCGCCCGCTCGCCAGG   | Cloning/RT-PCR                       |
| PnrDD new-low      | AATCGATCAGGGTGGCCGGCCAGGTAG    | Cloning/RT-PCR                       |
| AmR2-up            | CAACGACCTATGCCCCAGGTT          | Mutation of NrdRbox2 in <i>PnrDA</i> |
| AmR2-low           | AACCTGGGGCATAGGTCGTTG          | Mutation of NrdRbox2 in <i>PnrDA</i> |
| JmR2-up            | GGATAGAGGGATGGCTCGTAC          | Mutation of NrdRbox2 in <i>PnrDJ</i> |
| JmR2-low           | GTACGAGCCATCCCTCTATCC          | Mutation of NrdRbox2 in <i>PnrDJ</i> |
| DmR2-up            | AAACATGGCCGGCTGTGGAG           | Mutation of NrdRbox2 in <i>PnrDD</i> |
| DmR2-low           | CTCCACAGCCGGCCATGTTT           | Mutation of NrdRbox2 in <i>PnrDD</i> |
| TmR up             | CAGTTATGGACATCGGTGCC           | Mutation of NrdRbox2 in <i>PtopA</i> |
| TmR low            | GGCACCGATGTCCATAACTG           | Mutation of NrdRbox2 in <i>PtopA</i> |
| nrdATaqM-up        | CCCTTCCTGAAAGTGGTCAA           | qRT-PCR                              |
| nrdATaqM2-low      | TGTTTCATGTCGTGGGTACG           | qRT-PCR                              |
| nrdJTAqM-up        | CGGGTCAACGAACTGAACA            | qRT-PCR                              |
| nrdJTAqM2-low      | GTAAACACCCGCACCACTTC           | qRT-PCR                              |
| nrdDTaqM-up        | CCGAGATGGACCTGATCAAC           | qRT-PCR                              |
| nrdDTaqM2-low      | CCGAGTTGAGGAAGTTCTGG           | qRT-PCR                              |

|                 |                                |                                      |
|-----------------|--------------------------------|--------------------------------------|
| nrdRTaqM-up     | GTTCGACGAGGACAAGCTG            | RT-PCR                               |
| nrdRTaqM2-low   | ATGTAGGCGACTTCGTCGAG           | RT-PCR                               |
| gapTaqM-up      | GAGTGCACGGGGCTCTTC             | qRT-PCR                              |
| gapTaqM-low     | GAGGTTCTGGTCGTTGGT             | qRT-PCR                              |
| mexA-up         | GCCATGCGTGTACTGGTTCC           | RT-PCR                               |
| mexA-low        | GCTCTGGTAGTCGGCCTCGT           | RT-PCR                               |
| mexF-up         | CGAACTACGCGGTGCTCAAC           | RT-PCR                               |
| mexF-low        | GCGCGGATGATGATGTTCTC           | RT-PCR                               |
| cupA-up         | GTGATCCTCGACAGCGTACC           | RT-PCR                               |
| cupA-low        | GTCGTGCTGGTGCTGGTG             | RT-PCR                               |
| RhIRNdeI-up     | ACATATGAGGAATGACGGAGGCT        | RT-PCR                               |
| RhIR-low        | ATCAGATGAGACCCAGCGC            | RT-PCR                               |
| acsAa up        | TGGTACGACGACCTGATGAA           | RT-PCR                               |
| acsAa low       | CCTCGAACAGAATGGTGGTG           | RT-PCR                               |
| PAlexA- up      | ACATATGCAGAAGCTGACGCC          | RT-PCR                               |
| PAlexA-lw       | ACTCGAGTCAGCGCCGGATCACG        | RT-PCR                               |
| nrdA-FAM        | CTGGCACCTGGACATC               | qRT-PCR probe                        |
| nrdJ-FAM        | TCGGCTCGGTCAACCT               | qRT-PCR probe                        |
| nrdD-FAM        | CCCGACCTACAACATC               | qRT-PCR probe                        |
| gap-FAM         | CCTGCACCACCAACTG               | qRT-PCR probe                        |
| mutNarL1 up     | CGCGGATGCGCCCAATTGCGGCTTCCTTCA | Mutation of NarLbox1 in <i>PnrdR</i> |
| mut NarL1 low   | TGAAGGAAGCCGCAATTGGGCGCATCCGCG | Mutation of NarLbox1 in <i>PnrdR</i> |
| mutNarL1.2 up   | CGCGGATGCGCTGGCATGCGGCTTCCTTCA | Mutation of NarLbox1 in <i>PnrdR</i> |
| mutNarL1.2 low  | TGAAGGAAGCCGCATGCCAGCGCATCCGCG | Mutation of NarLbox1 in <i>PnrdR</i> |
| mutNarL1.3 up   | CGCGGATGCGCTGCCATGCGGCTTCCTTCA | Mutation of NarLbox1 in <i>PnrdR</i> |
| mutNarL1.3 low  | TGAAGGAAGCCGCATGGCAGCGCATCCGCG | Mutation of NarLbox2 in <i>PnrdR</i> |
| mutNarL R dir   | TTCCTTCAGCATAATTAGTATCAGCACCA  | Mutation of NarLbox2 in <i>PnrdR</i> |
| mutNarL R rev   | TGGTGCTGATACTAATTATGCTGAAGGAA  | Mutation of NarLbox2 in <i>PnrdR</i> |
| mut NarL2.2 up  | TTCCTTCAGCTGGGCCTGTATCAGCACCA  | Mutation of NarLbox2 in <i>PnrdR</i> |
| mut NarL2.2 low | TGGTGCTGATACAGGCCAGCTGAAGGAA   | Mutation of NarLbox2 in <i>PnrdR</i> |
| mut NarL2.3 up  | TTCCTTCAGCTGCGCCTGTATCAGCACCA  | Mutation of NarLbox2 in <i>PnrdR</i> |
| mutNarL 2.3 low | TGGTGCTGATACAGGCGCAGCTGAAGGAA  | Mutation of NarLbox2 in <i>PnrdR</i> |
