# Supplementary material for: Function of the Pseudomonas aeruginosa NrdR Transcription Factor: Global Transcriptomic Analysis and Its Role on Ribonucleotide Reductase Gene Expression
Source: PubMed Central journal article supplement (PMC4409342; doi:10.1371/journal.pone.0123571), 2015-04-24
Supplement: pone.0123571.s007.pdf [file pone.0123571.s007.pdf]

**S2 Table: Global transcriptomic analysis of a  $\Delta nrdR$  mutant strain compared with *P. aeruginosa* PAO1 wild-type strain grown aerobically.** List of all differentially regulated genes identified (more than 1.5-fold change in expression).

| <b>ID</b> | <b>Gene</b>  | <b>Operon arrangement</b> | <b>Log2 Fold Change</b> | <b>Gene Product</b>                                                                |
|-----------|--------------|---------------------------|-------------------------|------------------------------------------------------------------------------------|
| PA2128    | <i>cupA1</i> | <i>cupA12345</i>          | 4.13                    | Fimbrial subunit CupA1                                                             |
| PA4139    |              |                           | 3.78                    | Hypothetical protein                                                               |
| PA1383    |              |                           | 2.42                    | Hypothetical protein                                                               |
| PA5497    | <i>nrdJa</i> | <i>nrdJab</i>             | 2.41                    | Class II (cobalamin-dependent) ribonucleotide-diphosphate reductase subunit, NrdJa |
| PA2223    |              |                           | 2.37                    | Hypothetical protein                                                               |
| PA1718    | <i>pscE</i>  | <i>pscBCDEFGHIJKL</i>     | 2.32                    | Type III export protein PscE                                                       |
| PA1156    | <i>nrdA</i>  | <i>nrdAB</i>              | 2.24                    | Ribonucleoside reductase, large chain                                              |
| PA0992    | <i>cupC1</i> | <i>cupC123</i>            | 2.19                    | Fimbrial subunit CupC1                                                             |
| PA0425    | <i>mexA</i>  | <i>mexAB-oprM</i>         | 2.13                    | Resistance-Nodulation-Cell Division (RND) multidrug efflux membrane fusion protein |
| PA3188    |              |                           | 2.11                    | Hypothetical protein                                                               |
| PA0424    | <i>mexR</i>  |                           | 2.06                    | Multidrug resistance operon repressor MexR                                         |
| PA1693    | <i>pscR</i>  | <i>PA1697-pscOPQRSTU</i>  | 2.00                    | Translocation protein in type III secretion                                        |
| PA3144    |              |                           | 1.99                    | Hypothetical protein                                                               |
| PA2322    |              |                           | 1.98                    | Hypothetical protein                                                               |
| PA3842    |              |                           | 1.96                    | Hypothetical protein                                                               |

|        |              |                       |       |                                                                                  |
|--------|--------------|-----------------------|-------|----------------------------------------------------------------------------------|
| PA1155 | <i>nrdB</i>  | <i>nrdAB</i>          | 1.96  | Ribonucleoside reductase, small chain                                            |
| PA0865 | <i>hpd</i>   |                       | 1.94  | 4-hydroxyphenylpyruvate dioxygenase                                              |
| PA0426 | <i>mexB</i>  | <i>mexAB-oprM</i>     | 1.93  | Resistance-Nodulation-Cell Division (RND) multidrug efflux transporter MexB      |
| PA4086 | <i>cupB1</i> | <i>cupB123456</i>     | 1.89  | Probable fimbrial subunit CupB1                                                  |
| PA0887 | <i>acsA</i>  |                       | 1.84  | Acetyl-coenzyme A synthetase                                                     |
| PA0978 |              |                       | 1.78  | Hypothetical protein                                                             |
| PA5169 |              |                       | 1.77  | Hypothetical protein                                                             |
| PA1333 |              |                       | 1.65  | Hypothetical protein                                                             |
| PA1723 | <i>pscJ</i>  | <i>pscBCDEFGHIJKL</i> | 1.63  | Type III export protein PscJ                                                     |
| PA0958 | <i>oprD</i>  |                       | 1.61  | Basic amino acid, basic peptide and imipenem outer membrane porin OprD precursor |
| PA3720 |              |                       | 1.61  | Hypothetical protein                                                             |
| PA1386 |              |                       | 1.54  | Hypothetical protein                                                             |
| PA5491 |              |                       | 1.53  | Hypothetical protein                                                             |
| PA0717 |              |                       | 1.51  | Hypothetical protein                                                             |
| PA0427 | <i>oprM</i>  | <i>mexAB-oprM</i>     | 1.43  | Major intrinsic multiple antibiotic resistance efflux outer membrane protein Opr |
| PA2813 |              |                       | -1.58 | Hypothetical protein                                                             |
| PA4881 |              |                       | -1.59 | Hypothetical protein                                                             |
| PA0567 |              |                       | -1.64 | Hypothetical protein                                                             |
| PA2812 |              |                       | -1.68 | Hypothetical protein                                                             |
| PA2811 |              |                       | -1.75 | Hypothetical protein                                                             |

|        |             |                 |       |                                                                             |
|--------|-------------|-----------------|-------|-----------------------------------------------------------------------------|
| PA0281 | <i>cysW</i> |                 | -2.05 | Sulfate transport protein CysW                                              |
| PA2491 | <i>mexS</i> |                 | -2.18 | Hypothetical protein                                                        |
| PA3931 |             |                 | -2.21 | Hypothetical protein                                                        |
| PA3229 |             |                 | -2.37 | Hypothetical protein                                                        |
| PA4691 |             |                 | -2.55 | Hypothetical protein                                                        |
| PA0998 | <i>pqsC</i> | <i>pqsABCDE</i> | -2.83 | Homologous to beta-keto-acyl-acyl-carrier protein synthase                  |
| PA0565 |             |                 | -3.06 | Hypothetical protein                                                        |
| PA2494 | <i>mexF</i> |                 | -3.19 | Resistance-Nodulation-Cell Division (RND) multidrug efflux transporter MexF |
| PA3281 |             |                 | -3.73 | Hypothetical protein                                                        |
| PA3283 |             |                 | -4.57 | Hypothetical protein                                                        |

---
