# Supplementary material for: Function of the Pseudomonas aeruginosa NrdR Transcription Factor: Global Transcriptomic Analysis and Its Role on Ribonucleotide Reductase Gene Expression
Source: PubMed Central journal article supplement (PMC4409342; doi:10.1371/journal.pone.0123571), 2015-04-24
Supplement: pone.0123571.s008.pdf [file pone.0123571.s008.pdf]

**S3 Table: Global transcriptomic analysis of a  $\Delta nrdR$  mutant strain compared with *P. aeruginosa* PAO1 wild-type strain grown anaerobically.** List of all differentially regulated genes identified (more than 1.5-fold change in expression).

| <b>ID</b> | <b>Gene</b>  | <b>Operon arrangement</b>         | <b>Log2 Fold Change</b> | <b>Gene Product</b>                                                              |
|-----------|--------------|-----------------------------------|-------------------------|----------------------------------------------------------------------------------|
| PA5507    |              | <i>PA5506-PA5507-pauA7-PA5509</i> | 3.2                     | Hypothetical protein                                                             |
| PA5509    |              | <i>PA5506-PA5507-pauA7-PA5509</i> | 2.98                    | Hypothetical protein                                                             |
| PA4058    |              | <i>PA4058-PA4059-PA4060</i>       | 2.23                    | Hypothetical protein                                                             |
| PA1718    | <i>pscE</i>  | <i>exsD-pscBCDEFGHIJKL</i>        | 2.23                    | Type III export protein PscE                                                     |
| PA1984    | <i>exaC</i>  | <i>exaB-exaC</i>                  | 2.13                    | Hypothetical protein                                                             |
| PA0713    |              |                                   | 2.03                    | Hypothetical protein                                                             |
| PA1556    | <i>ccoO2</i> | <i>ccoN2-ccoO2</i>                | 1.90                    | Hypothetical protein                                                             |
| PA1073    | <i>braD</i>  | <i>braD-braE-braF-braG</i>        | 1.79                    | Branched-chain amino acid transport protein BraD                                 |
| PA1337    | <i>ansB</i>  | <i>ansB-PA1336-PA1335</i>         | 1.77                    | Glutaminase-asparaginase                                                         |
| PA1340    |              |                                   | 1.76                    | Hypothetical protein                                                             |
| PA1555    | <i>ccoP2</i> |                                   | 1.75                    | Hypothetical protein                                                             |
| PA0958    | <i>oprD</i>  |                                   | 1.7                     | Basic amino acid, basic peptide and imipenem outer membrane porin OprD precursor |
| PA1072    | <i>braE</i>  | <i>braD-braE-braF-braG</i>        | 1.69                    | Branched-chain amino acid transport protein BraE                                 |
| PA1070    | <i>braG</i>  | <i>braD-braE-braF-braG</i>        | 1.68                    | Branched-chain amino acid transport protein BraG                                 |
| PA5506    |              | <i>PA5506-PA5507-pauA7-PA5509</i> | 1.67                    | Hypothetical protein                                                             |

|        |             |                              |       |                                        |
|--------|-------------|------------------------------|-------|----------------------------------------|
| PA1341 |             | <i>PA1341-PA1340-PA1339</i>  | 1.63  | Hypothetical protein                   |
| PA2436 |             | <i>PA2436-PA2435-PA2434</i>  | 1.62  | Hypothetical protein                   |
| PA1596 | <i>htpG</i> | <i>htpG-PA1597</i>           | 1.57  | Heat shock protein HtpG                |
| PA3842 | <i>spcS</i> | <i>spcS-PA3843</i>           | 1.56  | Hypothetical protein                   |
| PA1339 |             | <i>PA1341-PA1340-PA1339</i>  | 1.54  | Hypothetical protein                   |
| PA4587 | <i>ccpR</i> |                              | 1.54  | Cytochrome c551 peroxidase precursor   |
| PA1338 | <i>ggt</i>  |                              | 1.53  | Gamma-glutamyltranspeptidase precursor |
| PA1571 |             |                              | 1.53  | Hypothetical protein                   |
| PA0026 | <i>plcB</i> | <i>plcB-PA0027-PA0028</i>    | -1.50 | Phospholipase C, PlcB                  |
| PA5107 | <i>blc</i>  | <i>fbp-PA5109-PA5108-blc</i> | -1.50 | Outer membrane lipoprotein Blc         |
| PA0612 | <i>ptrB</i> | <i>ptrB-PA0613</i>           | -1.54 | Transcriptional regulators             |
| PA0909 |             | <i>PA0908-PA0909</i>         | -1.54 | Membrane proteins                      |
| PA0462 |             | <i>PA0462-creB-creC</i>      | -1.55 | Hypothetical, unclassified, unknown    |
| PA3720 |             | <i>PA3720-armR</i>           | -1.55 | Hypothetical, unclassified, unknown    |
| PA5526 |             |                              | -1.55 | Hypothetical, unclassified, unknown    |
| PA4817 |             | <i>PA4816-PA4817</i>         | -1.56 | Hypothetical, unclassified, unknown    |
| PA5217 |             | <i>PA5218-PA5217-PA5216</i>  | -1.58 | Transport of small molecules           |
| PA0490 |             | <i>PA0491-PA0490</i>         | -1.59 | Hypothetical, unclassified, unknown    |
| PA5212 |             |                              | -1.60 | Hypothetical, unclassified, unknown    |
| PA3616 |             | <i>recA-PA3616</i>           | -1.61 | Hypothetical, unclassified, unknown    |

|        |             |                                           |       |                                                |
|--------|-------------|-------------------------------------------|-------|------------------------------------------------|
| PA0284 |             |                                           | -1.68 | Hypothetical, unclassified, unknown            |
| PA0327 |             |                                           | -1.69 | Hypothetical, unclassified, unknown            |
| PA4515 |             | <i>PA4515-PA4516</i>                      | -1.72 | Hypothetical, unclassified, unknown            |
| PA3413 |             | <i>PA3413-PA3414</i>                      | -1.73 | Hypothetical, unclassified, unknown            |
| PA0529 |             |                                           | -1.79 | Hypothetical, unclassified, unknown            |
| PA3008 |             | <i>lexA-PA3008</i>                        | -1.81 | Hypothetical, unclassified, unknown            |
| PA0130 | <i>bauC</i> | <i>bauA-bauB-bauC</i>                     | -1.83 | Carbon compound catabolism                     |
| PA3007 | <i>lexA</i> | <i>lexA-PA3008</i>                        | -1.88 | Repressor protein LexA                         |
| PA0922 |             |                                           | -1.89 | Hypothetical, unclassified, unknown            |
| PA3268 |             |                                           | -1.91 | Membrane proteins                              |
| PA0132 | <i>bauA</i> | <i>bauA-bauB-bauC</i>                     | -1.92 | Amino acid biosynthesis and metabolism         |
| PA0132 | <i>recA</i> | <i>recA-PA3616</i>                        | -1.96 | RecA protein                                   |
| PA0131 | <i>bauB</i> | <i>bauA-bauB-bauC</i>                     | -2.01 | Carbon compound catabolism                     |
| PA0283 | <i>sbp</i>  |                                           | -2.01 | Sulfate-binding protein precursor              |
| PA0204 |             | <i>PA0206-PA0205-PA0204-PA0203</i>        | -2.17 | Membrane proteins/Transport of small molecules |
| PA0622 |             | <i>PA0622-PA0623-PA0624</i>               | -2.18 | Related to phage, transposon, or plasmid       |
| PA2813 |             | <i>PA2813-PA2812-PA2811</i>               | -2.24 | Central intermediary metabolism                |
| PA0911 |             |                                           | -2.32 | Hypothetical, unclassified, unknown            |
| PA4195 |             | <i>PA4195-PA4194-PA4193-PA4192-PA4191</i> | -2.33 | Transport of small molecules                   |
| PA3445 |             |                                           | -2.34 | Hypothetical, unclassified, unknown            |

|        |               |                                           |       |                                              |
|--------|---------------|-------------------------------------------|-------|----------------------------------------------|
| PA0621 |               | <i>PA0617-PA0618-PA0619-PA0620-PA0621</i> | -2.4  | Related to phage, transposon, or plasmid     |
| PA5525 |               | <i>PA5524-PA5525</i>                      | -2.42 | Transcriptional regulators                   |
| PA0641 |               |                                           | -2.44 | Related to phage, transposon, or plasmid     |
| PA0807 | <i>ampDh3</i> |                                           | -2.44 | Antibiotic resistance and susceptibility     |
| PA3866 |               |                                           | -2.45 | Secreted Factors (toxins, enzymes, alginate) |
| PA0646 |               | <i>PA0646-PA0647-PA0648</i>               | -2.48 | Hypothetical, unclassified, unknown          |
| PA3931 |               |                                           | -2.48 | Hypothetical, unclassified, unknown          |
| PA0610 | <i>prtN</i>   |                                           | -2.49 | Transcriptional regulator PrtN               |
| PA0633 |               | <i>PA0633-PA0634-PA0635</i>               | -2.52 | Related to phage, transposon, or plasmid     |
| PA0203 |               | <i>PA0206-PA0205-PA0204-PA0203</i>        | -2.59 | Transport of small molecules                 |
| PA1150 | <i>pys2</i>   |                                           | -2.62 | Pyocin S2                                    |
| PA0642 |               |                                           | -2.63 | Related to phage, transposon, or plasmid     |
| PA0648 |               | <i>PA0646-PA0647-PA0648</i>               | -2.63 | Related to phage, transposon, or plasmid     |
| PA0615 |               | <i>PA0614-PA0615-PA0616</i>               | -2.67 | Hypothetical, unclassified, unknown          |
| PA0647 |               | <i>PA0646-PA0647-PA0648</i>               | -2.68 | Related to phage, transposon, or plasmid     |
| PA0623 |               | <i>PA0622-PA0623-PA0624</i>               | -2.71 | Related to phage, transposon, or plasmid     |
| PA4763 | <i>recN</i>   |                                           | -2.71 | DNA repair protein RecN                      |
| PA0644 |               | <i>PA0643-PA0644-PA0645</i>               | -2.72 | Related to phage, transposon, or plasmid     |
| PA0910 |               |                                           | -2.72 | Hypothetical, unclassified, unknown          |
| PA0616 |               | <i>PA0614-PA0615-PA0616</i>               | -2.73 | Related to phage, transposon, or plasmid     |

|        |             |                                           |       |                                                                                |
|--------|-------------|-------------------------------------------|-------|--------------------------------------------------------------------------------|
| PA0619 |             | <i>PA0617-PA0618-PA0619-PA0620-PA0621</i> | -2.74 | Related to phage, transposon, or plasmid                                       |
| PA2485 |             | <i>PA2485-PA2486</i>                      | -2.77 | Hypothetical, unclassified, unknown                                            |
| PA0626 |             | <i>PA0625-PA0626-PA0627</i>               | -2.78 | Related to phage, transposon, or plasmid                                       |
| PA0620 |             | <i>PA0617-PA0618-PA0619-PA0620-PA0621</i> | -2.79 | Related to phage, transposon, or plasmid                                       |
| PA0625 |             | <i>PA0625-PA0626-PA0627</i>               | -2.84 | Related to phage, transposon, or plasmid                                       |
| PA0320 |             | <i>PA0319-PA0320</i>                      | -2.85 | Hypothetical, unclassified, unknown                                            |
| PA0613 |             | <i>ptrB-PA0613</i>                        | -2.87 | Hypothetical, unclassified, unknown                                            |
| PA0629 |             | <i>PA0628-PA0629-PA0630-PA0631-PA0632</i> | -2.87 | Related to phage, transposon, or plasmid                                       |
| PA0639 |             | <i>PA0636-PA0637-PA0638-PA0639-PA0640</i> | -2.93 | Related to phage, transposon, or plasmid                                       |
| PA2486 |             | <i>PA2485-PA2486</i>                      | -2.94 | Hypothetical, unclassified, unknown                                            |
| PA3446 |             |                                           | -2.95 | Hypothetical, unclassified, unknown                                            |
| PA0624 |             | <i>PA0622-PA0623-PA0624</i>               | -2.96 | Related to phage, transposon, or plasmid                                       |
| PA0637 |             | <i>PA0636-PA0637-PA0638-PA0639-PA0640</i> | -2.96 | Related to phage, transposon, or plasmid                                       |
| PA3938 |             | <i>PA3938-PA3937-PA3936</i>               | -2.97 | Transport of small molecules                                                   |
| PA2494 | <i>mexF</i> | <i>mexE-mexF-oprN</i>                     | -3.01 | Resistance-Nodulation-Cell Division (RND)<br>multidrug efflux transporter MexF |
| PA0632 |             | <i>PA0628-PA0629-PA0630-PA0631-PA0632</i> | -3.06 | Related to phage, transposon, or plasmid                                       |
| PA0635 |             | <i>PA0633-PA0634-PA0635</i>               | -3.13 | Related to phage, transposon, or plasmid                                       |
| PA0645 |             | <i>PA0643-PA0644-PA0645</i>               | -3.13 | Related to phage, transposon, or plasmid                                       |
| PA0627 |             | <i>PA0625-PA0626-PA0627</i>               | -3.15 | Related to phage, transposon, or plasmid                                       |

|        |              |                                           |       |                                                                  |
|--------|--------------|-------------------------------------------|-------|------------------------------------------------------------------|
| PA0638 |              | <i>PA0636-PA0637-PA0638-PA0639-PA0640</i> | -3.16 | Related to phage, transposon, or plasmid                         |
| PA0640 |              | <i>PA0636-PA0637-PA0638-PA0639-PA0640</i> | -3.17 | Related to phage, transposon, or plasmid                         |
| PA0628 |              | <i>PA0628-PA0629-PA0630-PA0631-PA0632</i> | -3.21 | Related to phage, transposon, or plasmid                         |
| PA0634 |              | <i>PA0633-PA0634-PA0635</i>               | -3.21 | Related to phage, transposon, or plasmid                         |
| PA0643 |              | <i>PA0643-PA0644-PA0645</i>               | -3.21 | Related to phage, transposon, or plasmid                         |
| PA0617 |              | <i>PA0617-PA0618-PA0619-PA0620-PA0621</i> | -3.33 | Related to phage, transposon, or plasmid                         |
| PA0636 |              | <i>PA0636-PA0637-PA0638-PA0639-PA0640</i> | -3.41 | Related to phage, transposon, or plasmid                         |
| PA0618 |              | <i>PA0617-PA0618-PA0619-PA0620-PA0621</i> | -3.46 | Related to phage, transposon, or plasmid                         |
| PA3229 |              |                                           | -3.51 | Hypothetical, unclassified, unknown                              |
| PA2484 |              |                                           | -3.55 | Hypothetical, unclassified, unknown                              |
| PA4881 |              |                                           | -3.77 | Hypothetical, unclassified, unknown                              |
| PA0985 | <i>pyoS5</i> |                                           | -3.9  | Membrane proteins/Secreted Factors (toxins, enzymes, alginate)   |
| PA2491 | <i>mexS</i>  |                                           | -4.69 | Negative regulation of secondary metabolite biosynthetic process |

---
